# Supplementary material
Source: Springer Nature journal article supplement (https://www.springermedizin.de/resource/supplementary/12883_2011_506_MOESM2_ESM.pdf/9455290)

**m/z 4810**

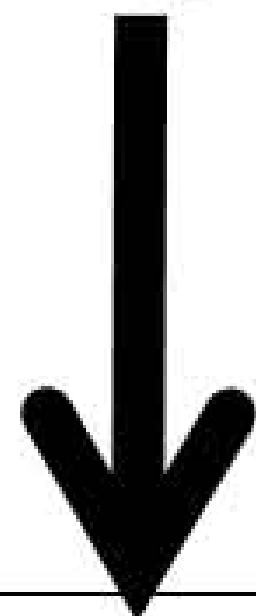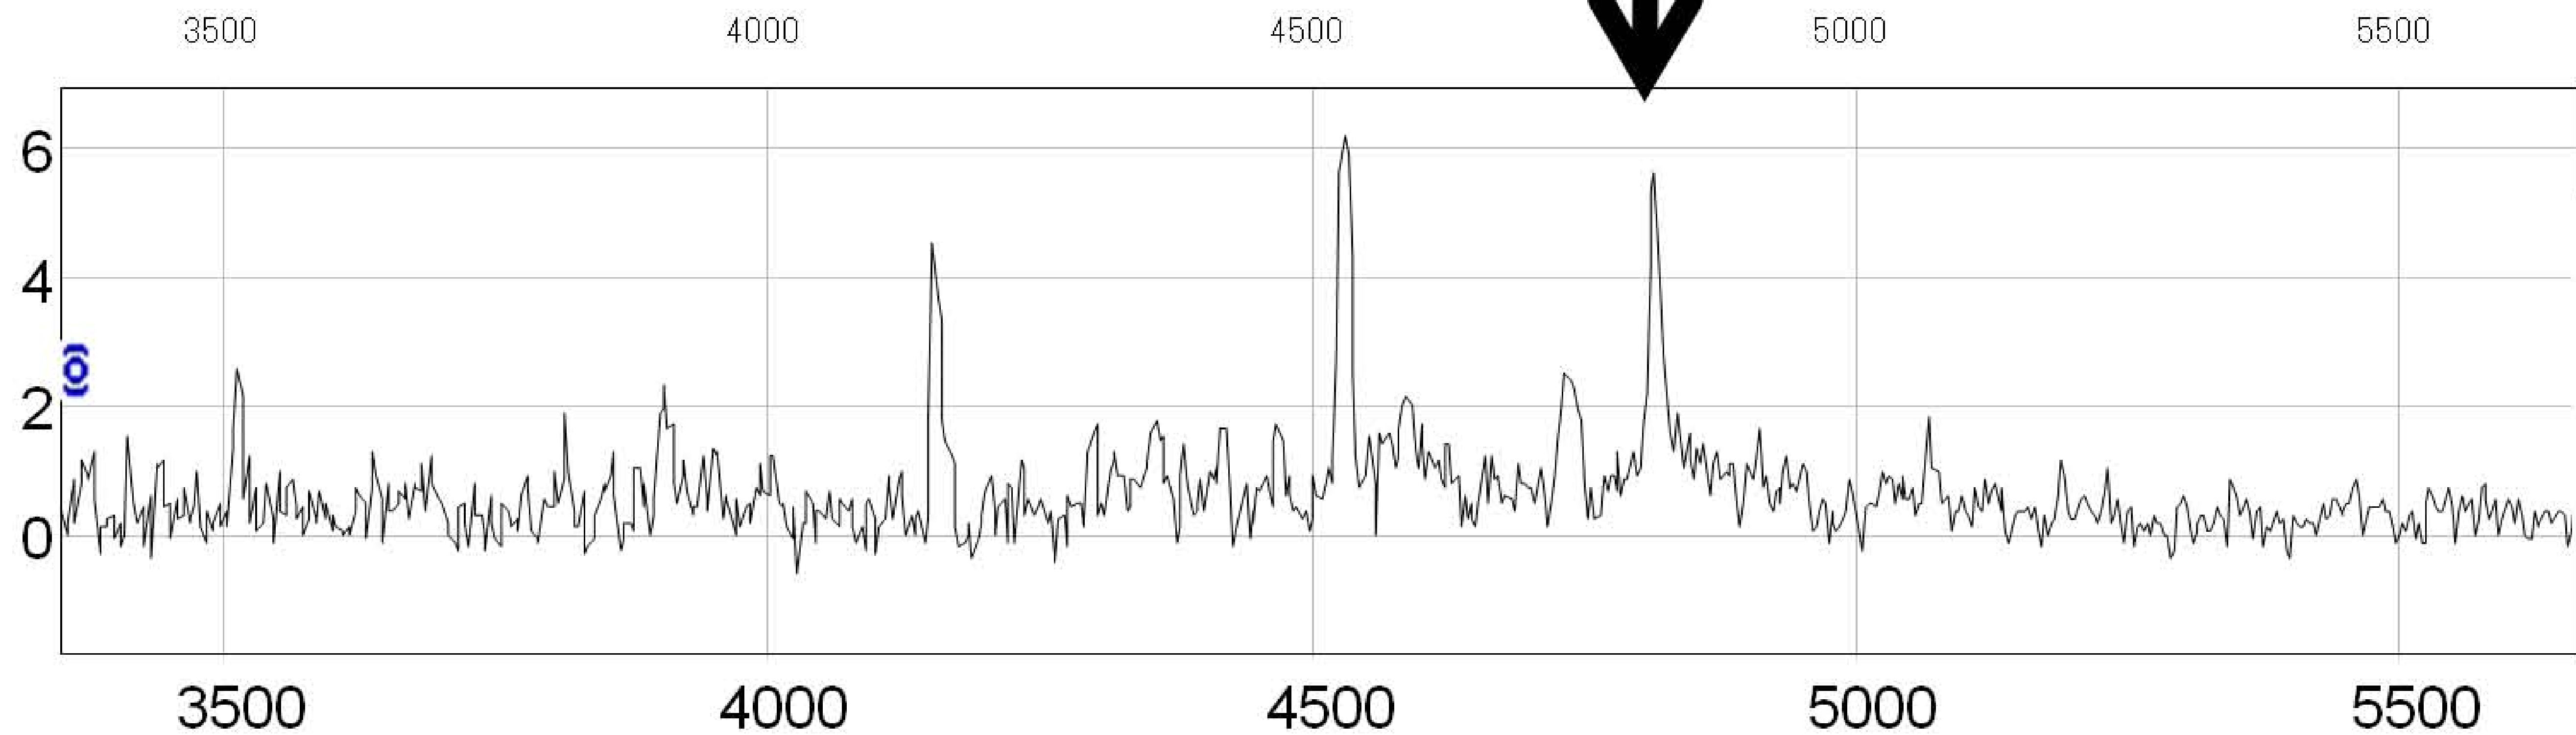

**Febrile  
Seizure**

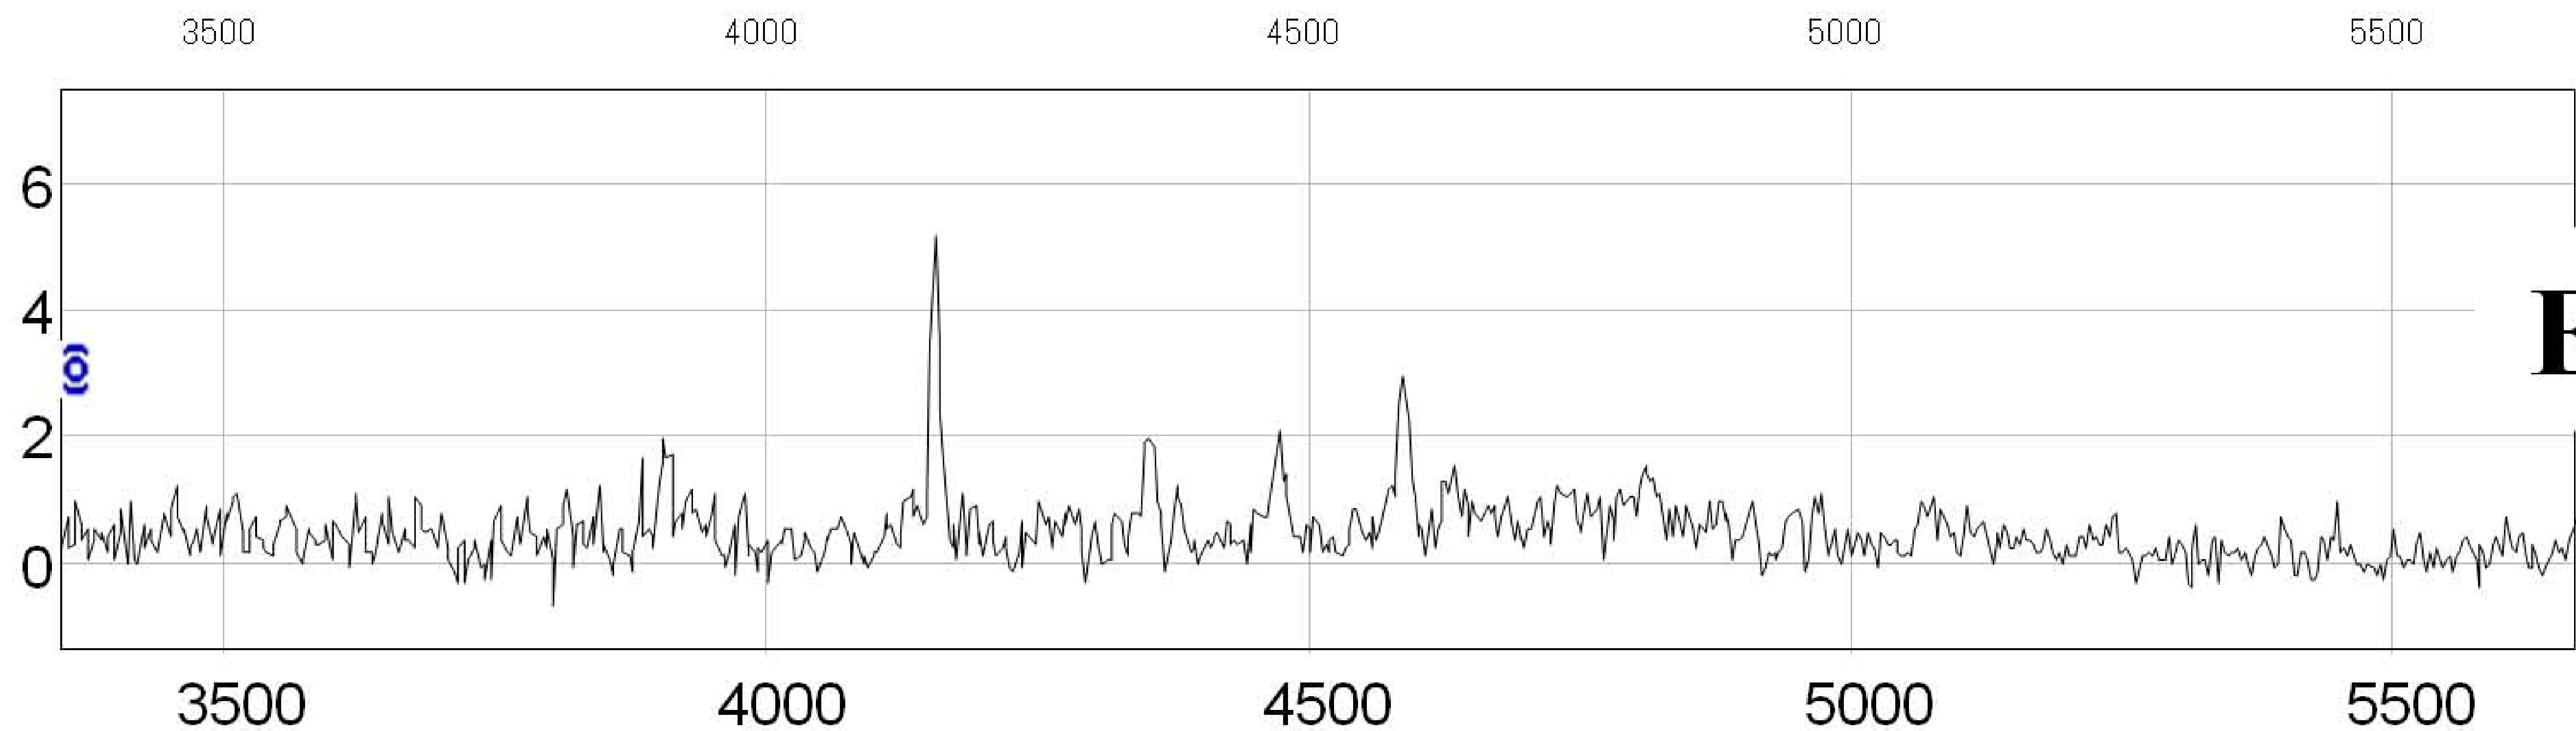

**Encephalopathy**

Supplement: MOESM2 [file 9455290]
